# Supplementary material for: Experimental and finite element method studies for femtomolar cobalt ion detection using a DHI modified nanochannel
Source: Royal Society of Chemistry journal article supplement (doi:10.1039/c9an01344j), 2019-01-01
Supplement: c9an01344j1.pdf [file c9an01344j1.pdf]

**Experimental and Finite Element Method Studies for Femtomolar  
Cobalt Ions Detection by a DHI Modified Nanochannel**

**Supporting Information**

*Xuye Liu, Qiang Zeng\*, Cheng Liu, Jie Yang and Lishi Wang\**

*School of Chemistry and Chemical Engineering, South China University of Technology,  
Guangzhou 510641, People's Republic of China*

*\* Corresponding author. E-mail address: ceqzeng@scut.edu.cn (Qiang Zeng)*

*\* Corresponding author. E-mail address: wanglsh@scut.edu.cn (Lishi Wang)*

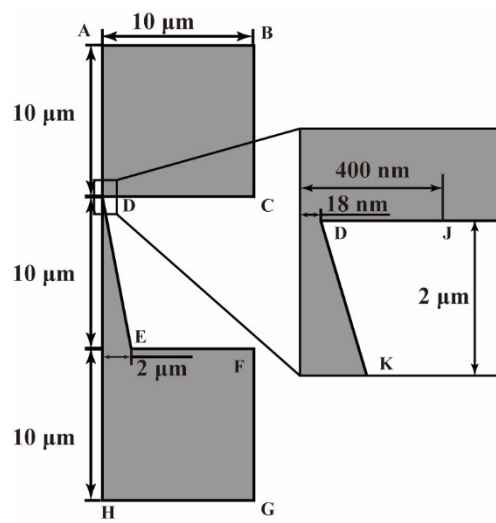

**Scheme S1.** Geometry of a 36 nm diameter conical nanopore. (A) to (K) shows the boundary between different conditions and details shown in Table S1.

**Table S1.** Details of boundary conditions used in modeling

| Surface            | Poisson                                               | Nernst-Planck                        | Navier-Stocks                                              |
|--------------------|-------------------------------------------------------|--------------------------------------|------------------------------------------------------------|
| AB                 | Constant potential                                    | Constant concentration               | Constant pressure                                          |
|                    | $\phi = 0$                                            | $c_K = c_{Cl} = 1 \text{ M}$         | $p = 0$                                                    |
|                    |                                                       | $c_{Co} = 1 \text{ nM}$              | no viscous stress<br>$n[\mu(\nabla u + (\nabla u)^T)] = 0$ |
| GH                 | Constant potential                                    | Constant concentration               | Constant pressure                                          |
|                    | $\phi = V$                                            | $c_K = c_{Cl} = 1 \text{ M}$         | $p = 0$                                                    |
|                    |                                                       | $c_{Co} = 0 \text{ M}$               | no viscous stress<br>$n[\mu(\nabla u + (\nabla u)^T)] = 0$ |
| BC, CJ, KE, EF, FG | Zero charge                                           | No flux                              | No slip                                                    |
|                    | $-\mathbf{n} \cdot (\epsilon \nabla \phi) = 0$        | $-\mathbf{n} \cdot \mathbf{N}_i = 0$ | $\mathbf{u} = 0$                                           |
| JD, DK             | $-0.012 \text{ C/m}^2$                                | No flux                              | No slip                                                    |
|                    | $-\mathbf{n} \cdot (\epsilon \nabla \phi) = \sigma_w$ | $-\mathbf{n} \cdot \mathbf{N}_i = 0$ | $\mathbf{u} = 0$                                           |
| AH                 | axial symmetry                                        | axial symmetry                       | axial symmetry                                             |

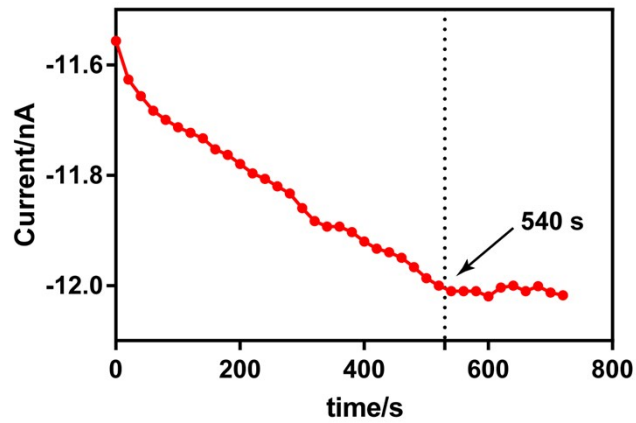**Figure S1.** The effect of  $\text{Co}^{2+}$  recognition quite time on the detection current of  $20 \mu\text{M}$  of  $\text{Co}^{2+}$  in a DHI modified nanopore with  $1 \text{ M}$  KCl aqueous electrolyte solution ( $\text{pH} = 7$ ).

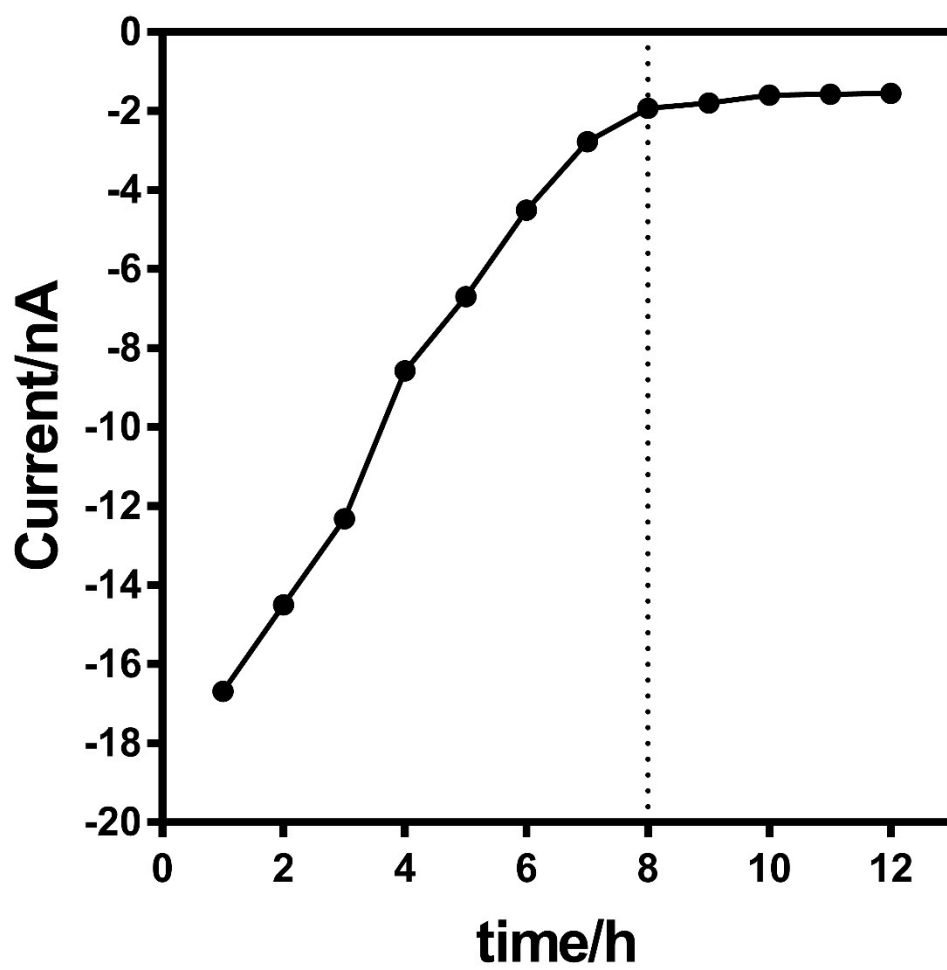

Figure S2. Negative ionic current trace with the change of immobilization time.

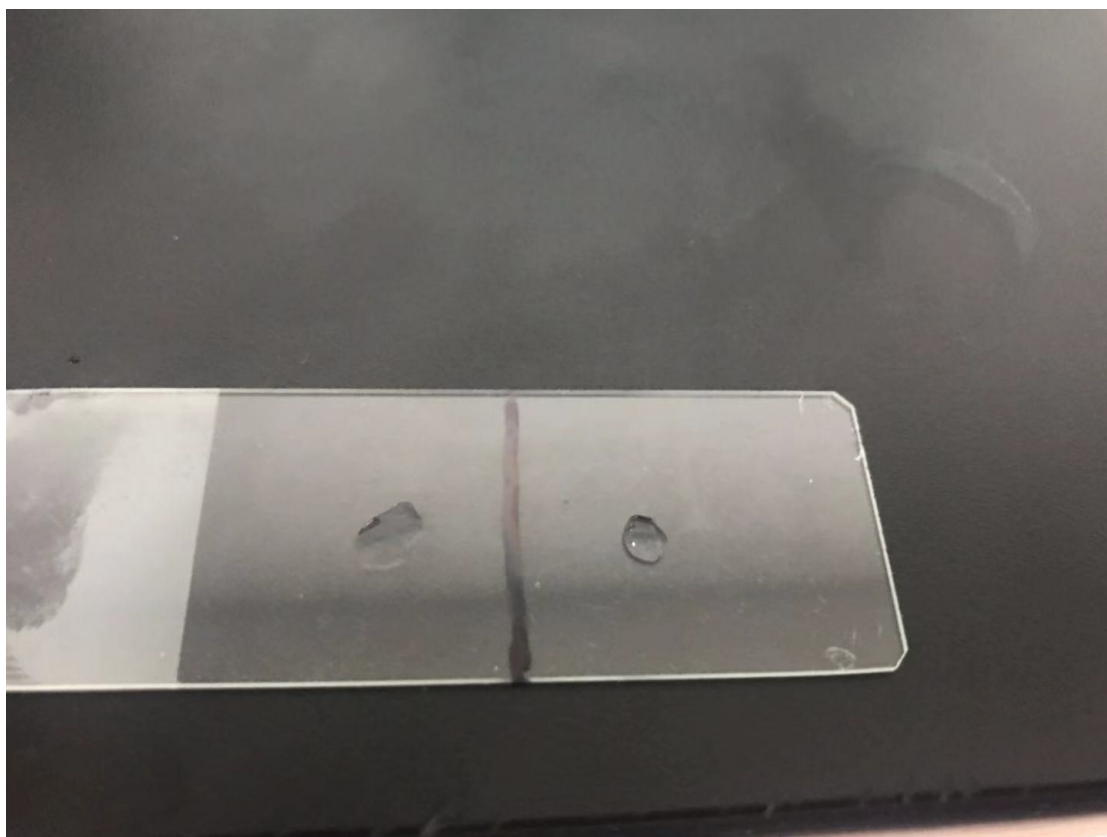

**Figure S3.** Wetting conditions of DHI modified quartz plate before (right) and after (left) 1 mM  $\text{CoCl}_2$  solution treating.

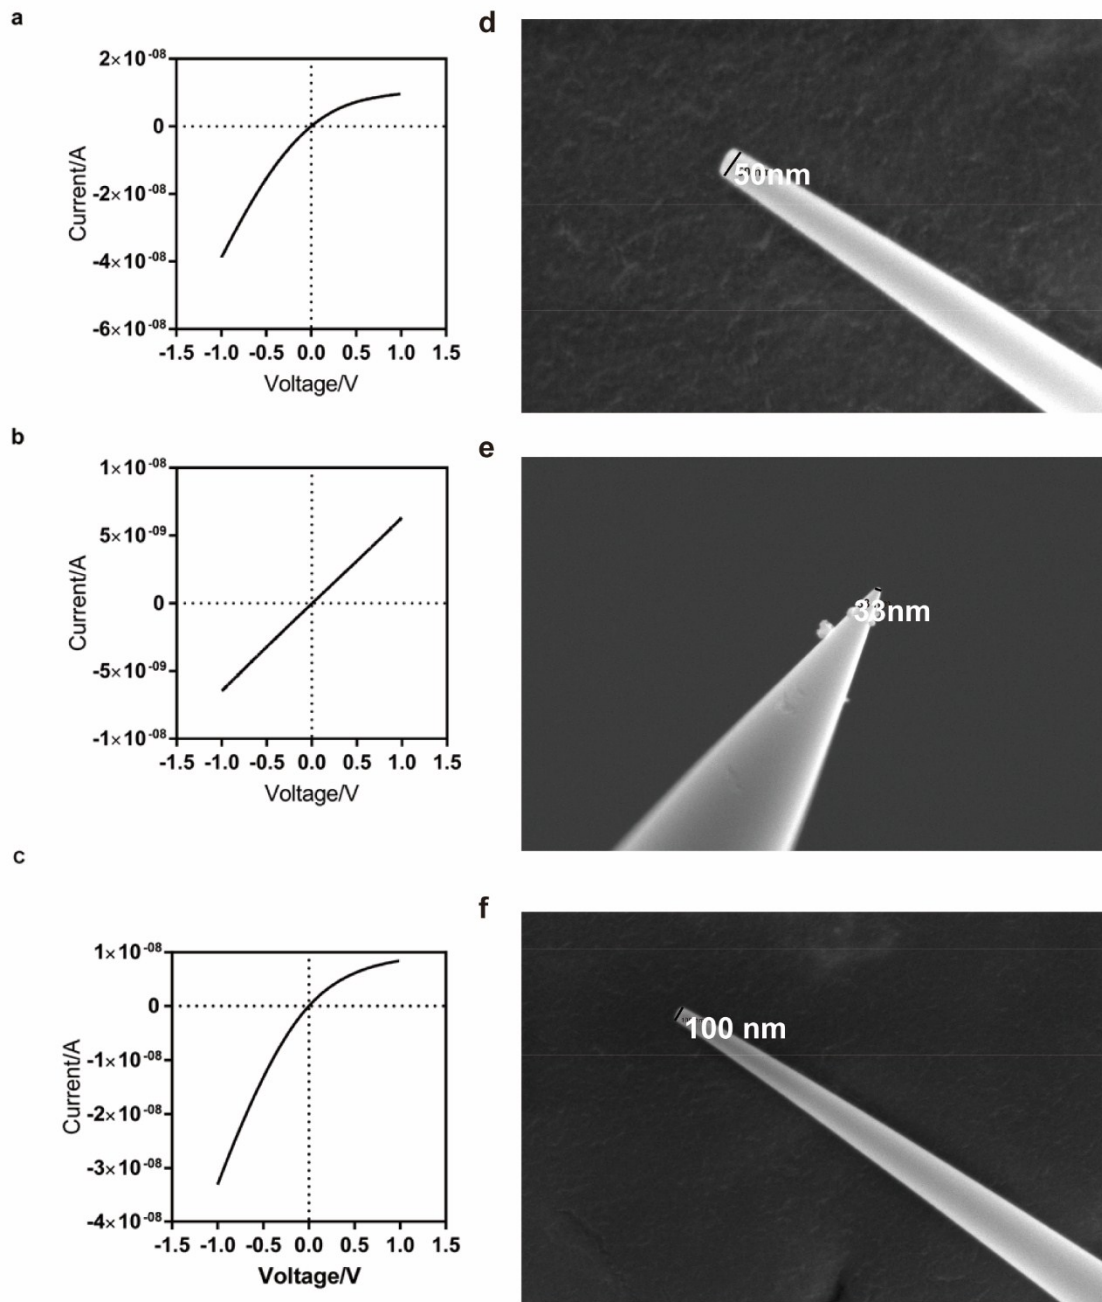

**Figure S4.** I-V curve of unmodified nanopore which produced by HEAT = 550 (a), HEAT = 675 (b) and HEAT = 575 (c) whose diameters were calculated as  $\sim 60$  nm,  $\sim 12$  nm and  $\sim 30$  nm, respectively. (d) to (f) are their SEM results, respectively.

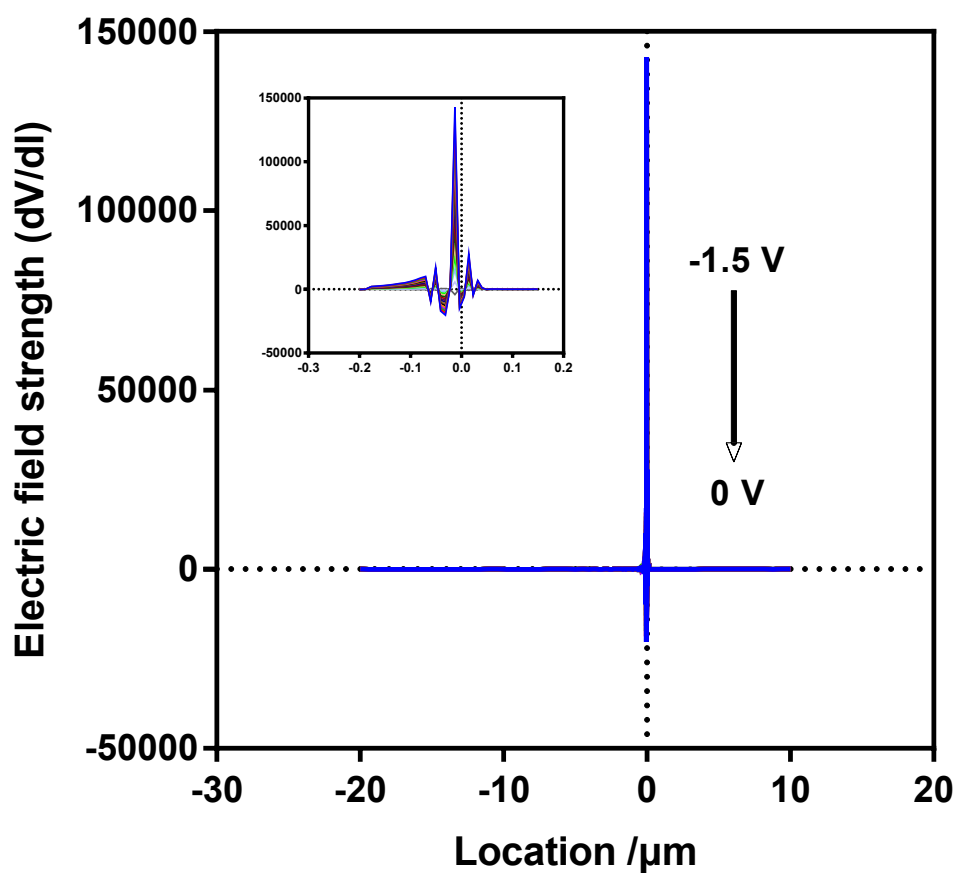

Figure S5. Voltage drop along the asymmetric axis under different applied voltage.

Table S2. Results of linear fitting for responses ionic current in alkaline electrolyte

| Potential (V) | Slope (nA/lgCo <sup>2+</sup> ) | Intercept (nA) | Goodness for linear fitting (R <sup>2</sup> ) |
|---------------|--------------------------------|----------------|-----------------------------------------------|
| -1            | -0.4917                        | -8.843         | 0.9913                                        |
| -0.8          | -0.3985                        | -7.814         | 0.9837                                        |
| -0.6          | -0.299                         | -6.232         | 0.9696                                        |
| -0.4          | -0.2032                        | -4.322         | 0.9551                                        |
| -0.2          | -0.1035                        | -2.245         | 0.9404                                        |

Table S3. Comparison of analytical methods for the detection of Co<sup>2+</sup>

| Method                       | Linear range<br>(nM)                       | Limit of detection<br>(nM) | References |
|------------------------------|--------------------------------------------|----------------------------|------------|
| Microextraction<br>method    | 0.6440 – 59.43                             | 0.06452                    | 1          |
| ICP-MS                       | 33.93 – 1696                               | 3.394                      | 2          |
| Fluorescence<br>spectrometry | 848.4 – 20362                              | 101.8                      | 3          |
| Fluorescence<br>spectrometry | 10 – 800                                   | 2.4                        | 4          |
| Modified<br>Nanopore         | $2.000 \times 10^{-5} - 2.000 \times 10^5$ | $9.402 \times 10^{-7}$     | This work  |

**Table S4. Results of the detection of Co<sup>2+</sup> in tap water**

| Sample | Co <sup>2+</sup> added<br>(nM) | Co <sup>2+</sup> measured<br>(nM) | Recovery (%) | RSD (% , N = 5) |
|--------|--------------------------------|-----------------------------------|--------------|-----------------|
| 1      | 0                              | \                                 | \            | 1.76            |
| 2      | 1                              | 0.96                              | 96.0         | 2.99            |
| 3      | 10                             | 9.84                              | 98.4         | 1.80            |
| 4      | 100                            | 100.19                            | 100.19       | 4.01            |

1. P. Berton and R. G. Wuilloud, *Analytica chimica acta*, 2010, **662**, 155-162.
2. A. Martín-Cameán, A. Jos, A. Calleja, F. Gil, A. Iglesias-Linares, E. Solano and A. M. Cameán, *Microchemical Journal*, 2014, **114**, 73-79.
3. C. Zeng, Y. Jia, Y.-I. Lee, X. Hou and L. Wu, *Microchemical Journal*, 2012, **104**, 33-37.
4. B.-Y. Han, X.-X. Hu, J. Xu and G.-H. He, *Journal of Nanoscience and Nanotechnology*, 2018, **18**, 7933-7938.
